# Supplementary material for: Structural Basis for TCR Recognition of a Rac1 Neoantigen Arising from Anchor Residue Mutation
Source: Research Square preprint supplement (doi:10.21203/rs.3.rs-7553693/v1), 2025-10-28

**Supplementary Information**

Structural Basis for TCR Recognition of a Rac1 Neoantigen Arising from Anchor Residue Mutation

Dandan Yang, Jianfeng Zhao, Wenyan Liao, Ping Yuan, Huimin Jin, Guodong Chen, Daichao Wu

**Supplementary Tables 1–5**

**Supplementary Figures 1–2**

Supplementary Table 1. Data collection and refinement statistics

|  | **5934**–**Rac1P29S**–**HLA-A2** | **Rac1P29S**–**HLA-A2** |
| --- | --- | --- |
| PDB | 9K2I | 9WK0 |
| **Data collection** |  |  |
| Resolution range (Å) | 49.46–3.08 (3.16–3.08) | 48.9–2.04 (2.11–2.04) |
| Space group | *P* 1 21 1 | *P* 21 21 21 |
| Unit cell parameters | 112.2, 147.38, 122.08  90, 94.25, 90 | 58.1, 102.7, 160.1  90, 90, 00 |
| Total reflectionsa | 479,383 (36,447) | 662,197 (50,844) |
| Unique reflectionsa | 72,310 (5,336) | 61,913 (6,115) |
| Multiplicitya | 6.6(6.8) | 10.7 (8.3) |
| Completeness (%)a | 98.8 (98.9) | 100 (99.9) |
| Mean *I*/s(*I*)a | 8.7(1.5) | 16.2 (2.6) |
| Wilson *B* factor (Å2) | 43.2 | 25.4 |
| *R*mergea,b | 0.198 (1.208) | 0.105 (0.895) |
| CC1/2 | 1.0 (0.88) | 0.999 (0.782) |
|  |  |  |
| **Refinement** |  |  |
| Reflections used in refinementa | 48,340 (4,771) | 61,913 (6,111) |
| *R*workc | 0.2221 (0.3197) | 0.188 (0.258) |
| *R*freec | 0.2902 (0.3876) | 0.232 (0.268) |
| No. of protein atoms | 26760 | 6,586 |
| No. of waters | 4 | 722 |
| Protein residues | 3316 | 817 |
| r.m.s.d. from ideality |  |  |
| Bond lengths (Å) | 0.010 | 0.017 |
| Bond angles (o) | 2.07 | 1.77 |
| Ramachandran plot statistics |  |  |
| Favored (%) | 94.8 | 97.1 |
| Allowed (%) | 5.1 | 2.9 |
| Disallowed (%) | 0.1 | 0 |
| Rotamer outliers (%) | 6.8 | 0 |
| Clashscore | 19.21 | 3.4 |
| Average *B* factor (Å2) | 75.3 | 32.6 |
| Protein | 44.5 | 31.9 |
| Waters | 0 | 39.4 |

aValues in parentheses correspond to the highest resolution shell.

b*R*merge = ∑|*I*j – <*I*>|/∑*I*j, where *I*j is the intensity of an individual reflection and <*I*> is the average intensity of that reflection.

c*R*work (*R*free) = ∑||*F*o| – |*F*c||/∑|*F*o|; 5.0% of data were used for *R*free.

Supplementary Table 2. TCR center positions over peptide-MHC plane for MHC class I complexes

| **Complex1** | **x pos2** | **y pos2** |
| --- | --- | --- |
| 7JWI | 22.8 | -14.5 |
| 5SWS | 22.3 | -14.8 |
| 5SWZ | 22.3 | -13.9 |
| 6VRN | 14.8 | -5.0 |
| 3TJH | 13.8 | -3.3 |
| 5TEZ | 13.0 | -0.8 |
| 3TF7 | 12.9 | 3.0 |
| 7RM4 | 12.8 | -3.7 |
| 3PQY | 12.5 | 1.6 |
| 4G9F | 12.5 | -4.8 |
| 3TFK | 12.4 | 2.5 |
| 4G8G | 12.2 | -4.6 |
| 7L1E | 12.0 | 2.0 |
| 5934 | 11.9 | -7.0 |
| 7NA5 | 11.9 | -3.9 |
| 3KPR | 11.8 | -1.4 |
| 3KPS | 11.8 | -1.3 |
| 7N5C | 11.4 | 1.3 |
| 4N0C | 11.3 | 1.6 |
| 4N5E | 11.3 | 1.8 |
| 4QRR | 10.9 | 0.2 |
| 5IVX | 10.9 | 1.6 |
| 7N5P | 10.8 | 1.2 |
| 7N4K | 10.7 | 1.4 |
| 6L9L | 10.6 | -4.2 |
| 1MI5 | 10.6 | -2.8 |
| 2OL3 | 10.6 | 0.1 |
| 5W1W | 10.4 | -0.5 |
| 6ZKX | 10.3 | -2.4 |
| 4MXQ | 10.3 | 2.9 |
| 1NAM | 10.0 | -1.8 |
| 5W1V | 10.0 | -0.6 |
| 6VRM | 9.8 | -1.8 |
| 6ZKY | 9.7 | -3.8 |
| 6ZKZ | 9.7 | -3.5 |
| 7RK7 | 9.7 | -3.8 |
| 6ZKW | 9.6 | -3.7 |
| 1FO0 | 9.6 | -0.4 |
| 5D2L | 8.8 | -1.7 |
| 7PBZ | 8.6 | -4.9 |
| 7N2O | 8.5 | 2.4 |
| 3TPU | 8.1 | 0.1 |
| 4MS8 | 8.0 | 1.8 |
| 7OW6 | 7.8 | -4.8 |
| 6VQO | 7.8 | 0.4 |
| 7OW5 | 7.8 | -4.8 |
| 7OW5 | 7.8 | -4.8 |
| 6RPA | 7.7 | -4.2 |
| 3GSN | 7.6 | -3.2 |
| 2OI9 | 7.4 | 2.2 |
| 5M01 | 7.4 | -2.2 |
| 6G9Q | 7.4 | -2.2 |
| 7N2R | 7.4 | 1.4 |
| 5M00 | 7.2 | -1.8 |
| 8CX4 | 7.2 | 2.1 |
| 7N2P | 7.2 | 1.4 |
| 7N2Q | 7.1 | 1.7 |
| 5D2N | 7.1 | -2.5 |
| 5HHO | 7.1 | 4.9 |
| 3E3Q | 7.0 | 2.0 |
| 5EUO | 7.0 | 4.6 |
| 8D5Q | 7.0 | 2.9 |
| 7N2N | 6.9 | 0.6 |
| 3E2H | 6.9 | 1.8 |
| 7NME | 6.8 | 3.2 |
| 2E7L | 6.8 | 1.9 |
| 2VLK | 6.8 | 4.5 |
| 4MVB | 6.8 | 1.2 |
| 5M02 | 6.8 | -2.1 |
| 7NMF | 6.7 | 3.5 |
| 5TIL | 6.6 | -2.1 |
| 7NDT | 6.6 | 2.5 |
| 7QPJ | 6.5 | 1.8 |
| 2VLR | 6.5 | 4.5 |
| 5HHM | 6.5 | 4.7 |
| 7NMG | 6.4 | 3.3 |
| 8QFY | 6.4 | -1.3 |
| 8RYO | 6.4 | -6.3 |
| 5E6I | 6.4 | 6.5 |
| 5TJE | 6.4 | -2.2 |
| 2VLJ | 6.4 | 4.9 |
| 7N2S | 6.4 | 0.4 |
| 6RPB | 6.4 | -3.1 |
| 6Q3S | 6.4 | -2.1 |
| 8SHI | 6.3 | -2.5 |
| 2ESV | 6.3 | 2.4 |
| 7PDW | 6.3 | 2.2 |
| 8EO8 | 6.3 | 4.4 |
| 7N1F | 6.2 | 2.2 |
| 3SJV | 6.2 | -2.5 |
| 8EN8 | 6.2 | 4.3 |
| 7PBC | 6.2 | 2.5 |
| 7RTR | 6.1 | 2.0 |
| 8RYM | 6.1 | -6.6 |
| 8RYN | 6.1 | -6.1 |
| 2F54 | 6.1 | -2.6 |
| 1G6R | 6.0 | 1.2 |
| 1MWA | 5.9 | 1.5 |
| 2BNQ | 5.9 | -1.9 |
| 7NDQ | 5.9 | 1.4 |
| 8GON | 5.9 | -0.8 |
| 8ENH | 5.8 | 4.4 |
| 8GOM | 5.8 | -1.2 |
| 1OGA | 5.8 | 4.0 |
| 2PYE | 5.8 | -3.6 |
| 4EUP | 5.8 | 1.3 |
| 5EU6 | 5.8 | 1.1 |
| 6MTM | 5.8 | 1.0 |
| 8RYP | 5.8 | -0.5 |
| 7PBE | 5.8 | 1.7 |
| 2BNR | 5.7 | -2.1 |
| 2P5E | 5.7 | -3.5 |
| 2CKB | 5.7 | 1.7 |
| 7NDU | 5.7 | 1.6 |
| 2P5W | 5.6 | -3.5 |
| 5YXU | 5.6 | -2.7 |
| 2YPL | 5.5 | 1.2 |
| 7N6E | 5.4 | 0.8 |
| 4MJI | 5.4 | 1.9 |
| 5WLG | 5.3 | 1.5 |
| 5YXN | 5.2 | -2.5 |
| 6P64 | 5.2 | -2.6 |
| 5JZI | 5.2 | -1.7 |
| 8RYQ | 5.1 | -0.2 |
| 2F53 | 5.0 | -3.0 |
| 3QDM | 4.9 | -2.3 |
| 5E9D | 4.8 | 5.3 |
| 7JWJ | 4.7 | -4.5 |
| 2J8U | 4.7 | 2.7 |
| 8RLT | 4.7 | 2.7 |
| 8RLV | 4.7 | 2.6 |
| 6UK2 | 4.7 | 0.0 |
| 5ISZ | 4.6 | 3.9 |
| 5JHD | 4.5 | 4.9 |
| 6UK4 | 4.5 | -0.4 |
| 6BJ2 | 4.4 | 5.6 |
| 8RLU | 4.4 | 2.3 |
| 8WUL | 4.3 | 2.6 |
| 6Vm8 | 4.3 | 1.2 |
| 2JCC | 4.2 | 2.5 |
| 6RP9 | 4.2 | 0.9 |
| 8DNT | 4.1 | -2.1 |
| 6Vm7 | 4.1 | 0.9 |
| 5MEN | 4.1 | 5.1 |
| 2UWWE | 4.1 | 2.6 |
| 7RRG | 4.1 | -2.8 |
| 8WTE | 4.1 | 2.8 |
| 1LP9 | 4.0 | 2.7 |
| 4NHU | 4.0 | -5.7 |
| 5XOT | 4.0 | -1.9 |
| 6VmX | 4.0 | 1.4 |
| 4MNQ | 3.9 | 5.2 |
| 6BJ3 | 3.8 | -1.0 |
| 6RSY | 3.6 | 1.6 |
| 6BJ8 | 3.6 | -1.1 |
| 3DXA | 3.6 | -1.5 |
| 5XOV | 3.6 | 1.7 |
| 3RGV | 3.4 | -1.2 |
| 4PRH | 3.4 | 3.0 |
| 8I5C | 3.1 | 2.3 |
| 3MV7 | 3.1 | 2.4 |
| 3MV8 | 3.1 | 2.6 |
| 3MV9 | 3.1 | 2.7 |
| 4PRP | 3.0 | 2.6 |
| 4PRI | 2.9 | 2.6 |
| 7L1D | 2.9 | 1.8 |
| 7PHR | 2.9 | 1.4 |
| 7R80 | 2.8 | 0.8 |
| 3VXM | 2.7 | -3.4 |
| 5NHT | 2.7 | 1.1 |
| 5NQK | 2.4 | 0.9 |
| 5NMG | 2.2 | 3.2 |
| 3VXS | 2.1 | -0.6 |
| 5C0B | 2.1 | -1.9 |
| 3UTT | 2.1 | -1.9 |
| 3QEQ | 2.0 | -0.8 |
| 6AVG | 2.0 | 1.2 |
| 8F5A | 1.9 | 4.8 |
| 3KXF | 1.7 | 8.5 |
| 3O4L | 1.7 | -1.2 |
| 5C0C | 1.7 | -1.7 |
| 5NME | 1.7 | 3.1 |
| 6D78 | 1.7 | -0.2 |
| 4L3E | 1.6 | -0.4 |
| 3VXR | 1.5 | -0.6 |
| 5C08 | 1.4 | -2.8 |
| 5C0A | 1.4 | -0.8 |
| 3WOW | 1.3 | 2.6 |
| 3QDG | 1.3 | -1.0 |
| 5C09 | 1.3 | -1.5 |
| 5WKF | 1.3 | -1.3 |
| 6DKP | 1.3 | -0.2 |
| 2AK4 | 1.2 | 6.6 |
| 3QDJ | 1.2 | -0.9 |
| 5C07 | 1.2 | -1.7 |
| 5NMF | 1.2 | 3.2 |
| 5WKH | 1.2 | -1.6 |
| 3VXU | 1.1 | 3.3 |
| 8I5D | 1.1 | 0.6 |
| 5HYJ | 1.0 | -2.3 |
| 6AM5 | 0.9 | -0.8 |
| 4JRX | 0.8 | 8.5 |
| 7QP9 | 0.7 | -1.4 |
| 1KJ2 | 0.7 | 2.5 |
| 2GJ6 | 0.6 | 1.8 |
| 7Q9B | 0.5 | -3.7 |
| 3UTS | 0.4 | -0.2 |
| 6R2L | 0.4 | 10.3 |
| 6UON | 0.2 | 2.7 |
| 6EQA | 0.2 | -1.5 |
| 3D3V | 0.1 | 1.7 |
| 4JFD | 0.1 | -2.5 |
| 5BRZ | 0.1 | 6.4 |
| 5BS0 | 0.1 | 6.8 |
| 6TMO | 0.0 | -2.2 |
| 3QFJ | 0.0 | 1.7 |
| 6EQB | 0.0 | -2.2 |
| 3D39 | 0.0 | 1.7 |
| 8GVI | 0.0 | -0.4 |
| 7BYD | 0.0 | 3.0 |
| 3PWP | -0.1 | 1.6 |
| 4JFE | -0.1 | -2.4 |
| 4JFF | -0.1 | -2.4 |
| 4QOK | -0.1 | -1.8 |
| 6AMU | -0.1 | 0.2 |
| 7Q9A | -0.2 | -1.9 |
| 1QRN | -0.2 | 2.0 |
| 3H9S | -0.2 | 2.0 |
| 3HG1 | -0.2 | -1.9 |
| 4FTV | -0.3 | 1.6 |
| 8GVG | -0.4 | -0.1 |
| 1AO7 | -0.4 | 2.0 |
| 6Vm9 | -0.5 | 1.0 |
| 8GVB | -0.5 | 0.2 |
| 1QSE | -0.5 | 1.4 |
| 6VmA | -0.6 | 1.7 |
| 6VmC | -0.6 | 2.1 |
| 2NX5 | -0.7 | 2.4 |
| 1QSF | -0.8 | 1.5 |
| 4QRP | -0.9 | -1.3 |
| 1BD2 | -1.3 | -0.3 |
| 6AVF | -1.7 | -0.1 |
| 3FFC | -2.3 | 2.9 |
| 7SU9 | -3.4 | 5.5 |
| 6ULR | -3.5 | 5.2 |
| 6ULN | -3.5 | 4.9 |
| 6TRO | -6.1 | 5.5 |
| 4JRY | -14.6 | 0.8 |
| 6UZ1 | -34.8 | -14.3 |

1 PDB code for complex structure, with new structures described in this work given by TCR name (5934) and corresponding rows highlighted.

2 TCR–pMHC complexes were oriented into a common reference frame centered at average Ca atom position of MHC helices, and rotated such that the x-y plane is parallel with the helix plane, and the x-axis is parallel to peptide groove, with greater x value corresponding to peptide C terminus. TCR variable domain centers were calculated by taking centers of individual variable domains by average positions of Sγ atoms of conserved Cys residues (or Ca atoms at corresponding positions where Cys residues are not present in the TCR), and then calculating the mean position of TCR Va and Vb centers. X position (x pos) and y position (y pos) values represent projections into the x-y plane, and thus the MHC helix plane, of these centers.

Supplementary Table 3. Interactions between TCRs and HLA-A2

|  | Hydrogen bonds | Van der Waals contacts |
| --- | --- | --- |
| HLA-A2 | TCR 5934 | |
| R65H | R95a(Nη1)R65H(Nη1)  R95a(Nη2)R65H(Nη1) | A30a(3)  R95a(9) |
| A69H |  | Q99a(2) |
| Q72H |  | I55b(5) |
| R75H | E53b(Oε1)R75H(Nη1)  E53b(Oε1)R75H(Nε)  E53b(Oε1)R75H(Nη2)  L54b(O)R75H(Nη2) | E53b(2)  L54b(2)  I55b(3) |
| V76H |  | N50b(5) |
| T80H |  | D30b(1)  A97b(1) |
| Y84H |  | A97b(1) |
| K146H | G98b(O)K146H(O) | G98b(4)  L101b(3) |
| W147H |  | G98b(3)  G99b(1) |
| A149H | R52a(Nη2)A149H(O) |  |
| A150H |  | R52a(4)  G98b(1) |
| H151H |  | S53a(1) |
| E154H |  | S53a(1) |
| Q155H |  | N32a(5)  S53a(1) |

Contact residues were identified with CONTACT. Hydrogen bonds were calculated using a cut-off distance of 3.5 Å. The cut-off distance for van der Waals contacts was 4.0 Å.

Supplementary Table 4. Interactions between TCR 5934 and Rac1P29S peptide

|  | Hydrogen bonds | Van der Waals contacts |
| --- | --- | --- |
| Rac1P29S | TCR 5934 | |
| E4p |  | A30a(2) |
| Y5p |  | N32a(1) |
| P7p |  | G99b(2) |
| T8p | A97b(N)T8p(Oγ1)  G98b(N)T8p(O)  G99b(O)T8p(N)  G99b(N)T8p(O)  G99b(N)T8p(Oγ1)  G99b(O)T8p(Oγ1)  P100b(N)T8p(Oγ1) | A97b(4)  G98b(4)  G99b(6)  P100b(2) |
| V9p |  | A97b(2)  G98b(3) |

Contact residues were identified with CONTACT. Hydrogen bonds were calculated using a cut-off distance of 3.5 Å. The cut-off distance for van der Waals contacts was 4.0 Å.

Supplementary Table 5. Sequences of codon-optimized TCR genes

| **Name** | **Sequence** |
| --- | --- |
| TCR 5934 alpha | ATGGGTGAAAACGTTGAACAGCATCCGAGTACCCTGAGCGTTCAGGAAGGCGATAGCGCCGTGATTAAGTGCACCTATAGCGATAGTGCAAGCAATTATTTCCCGTGGTATAAACAGGAACTGGGTAAAGGCCCGCAGCTGATTATTGATATTCGTAGCAATGTGGGCGAAAAAAAAGATCAGCGTATTGCCGTGACCCTGAATAAGACCGCAAAACATTTTAGTCTGCACATTACCGAAACCCAGCCGGAAGATAGCGCCGTTTATTTTTGTGCCGCAAGTCGTGGTGGTGCCCAGAAACTGGTGTTTGGCCAGGGTACCCGCCTGACAATTAATCCGAATATCCAGAACCCGGATCCGGCGGTGTATCAGCTGCGTGATAGCAAAAGCAGCGATAAAAGCGTGTGCCTGTTTACCGATTTTGATAGCCAGACCAACGTGAGCCAGAGCAAAGATAGCGATGTGTATATTACCGATAAATGCGTGCTGGATATGCGTAGCATGGATTTTAAAAGCAACAGCGCGGTGGCGTGGAGCAACAAAAGCGATTTTGCGTGCGCGAACGCGTTTAACAACAGCATCATTCCGGAAGATACCTTCTTTCCGAGCCCGGAAAGCAGCTAATGA |
| TCR 5934 beta | ATGGACACCGCTGTTAGCCAGACCCCGAAATATCTGGTTACCCAGATGGGTAATGATAAAAGCATTAAGTGCGAGCAGAACCTGGGTCATGATACCATGTATTGGTATAAACAGGACAGTAAGAAGTTCCTGAAGATTATGTTCAGCTACAACAACAAGGAGCTGATTATTAACGAGACCGTGCCGAATCGCTTTAGTCCGAAAAGTCCGGATAAAGCCCATCTGAATCTGCATATTAACAGTCTGGAACTGGGCGATAGTGCAGTGTATTTTTGCGCCAGCAGCCAGCTGGCCGGCGGTCCTCTGTACAATGAACAGTTTTTCGGCCCGGGTACCCGCCTGACAGTTTTAGAGGATCTGAAAAACGTGTTTCCGCCGGAAGTGGCGGTGTTTGAACCGAGCGAAGCGGAAATTAGCCATACCCAGAAAGCGACCCTGGTGTGCCTGGCGACCGGCTTTTATCCGGATCATGTGGAACTGAGCTGGTGGGTGAACGGCAAAGAAGTGCATAGCGGCGTGTGCACCGATCCGCAGCCGCTGAAAGAACAGCCGGCGCTGAACGATAGCCGCTATGCGCTGAGCAGCCGCCTGCGCGTGAGCGCGACCTTTTGGCAGAACCCGCGCAACCATTTTCGCTGCCAGGTGCAGTTTTATGGCCTGAGCGAAAACGATGAATGGACCCAGGATCGCGCGAAACCGGTGACCCAGATTGTGAGCGCGGAAGCGTGGGGCCGTGCGGATTAA |

Supplementary Figure 1


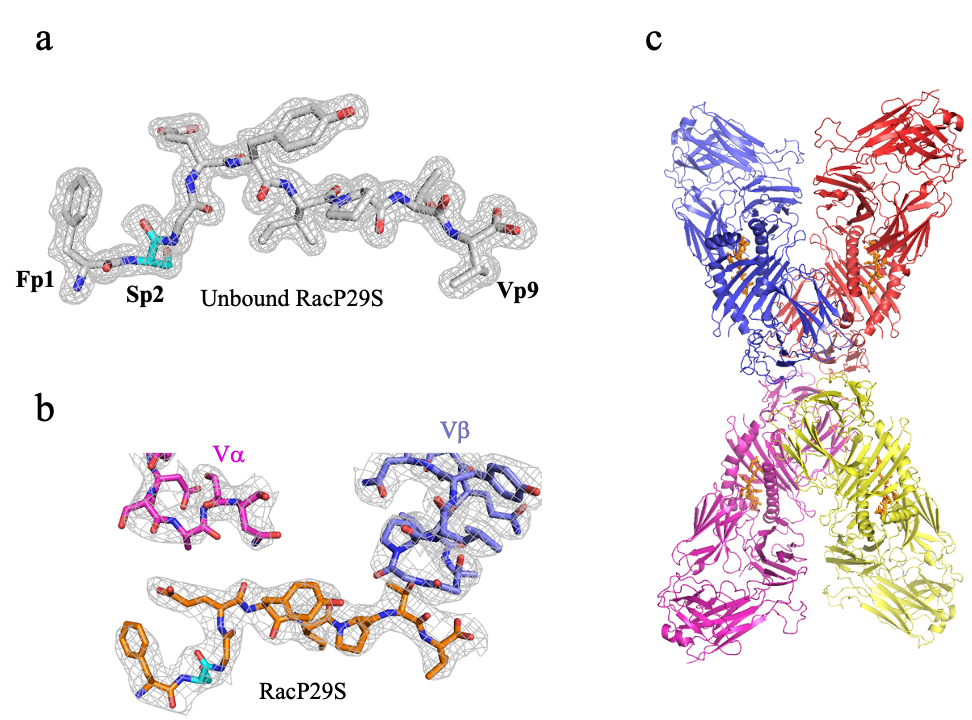


**Supplementary Figure 2**


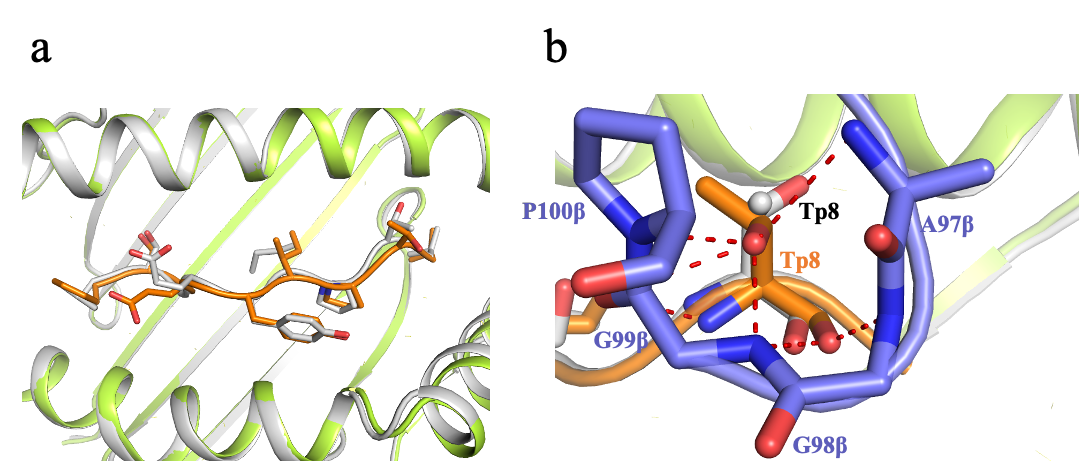

Supplement: Supplementary file 1 [file 86a9de5517ee3562ac7069c6.docx]
